# Supplementary material for: Interaction between Persistent Organic Pollutants and ZnO NPs in Synthetic and Natural Waters
Source: MDPI journal article supplement (doi:10.3390/nano9030472), 2019-03-21
Supplement: s1 [file s1]

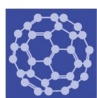

# Interaction between Persistent Organic Pollutants and ZnO NPs in Synthetic and Natural Waters

Rizwan Khan <sup>1</sup>, Muhammad Ali Inam <sup>1</sup>, Sarfaraz Khan <sup>2</sup>, Du Ri Park <sup>1</sup> and Ick Tae Yeom <sup>1,\*</sup>

<sup>1</sup> Graduate School of Water Resources, Sungkyunkwan University (SKKU) 2066, Suwon 16419, Korea; rizwankhan@skku.edu (R.K.); aliinam@skku.edu (M.A.I.); enfl8709@skku.edu (D.R.P.)

<sup>2</sup> Key Laboratory of the Three Gorges Reservoir Region Eco-Environment, State Ministry of Education, Chongqing University, Chongqing 400045, China; Sfk.jadoon@yahoo.com

\* Correspondence: yeom@skku.edu; Tel.: +82-31-299-6699

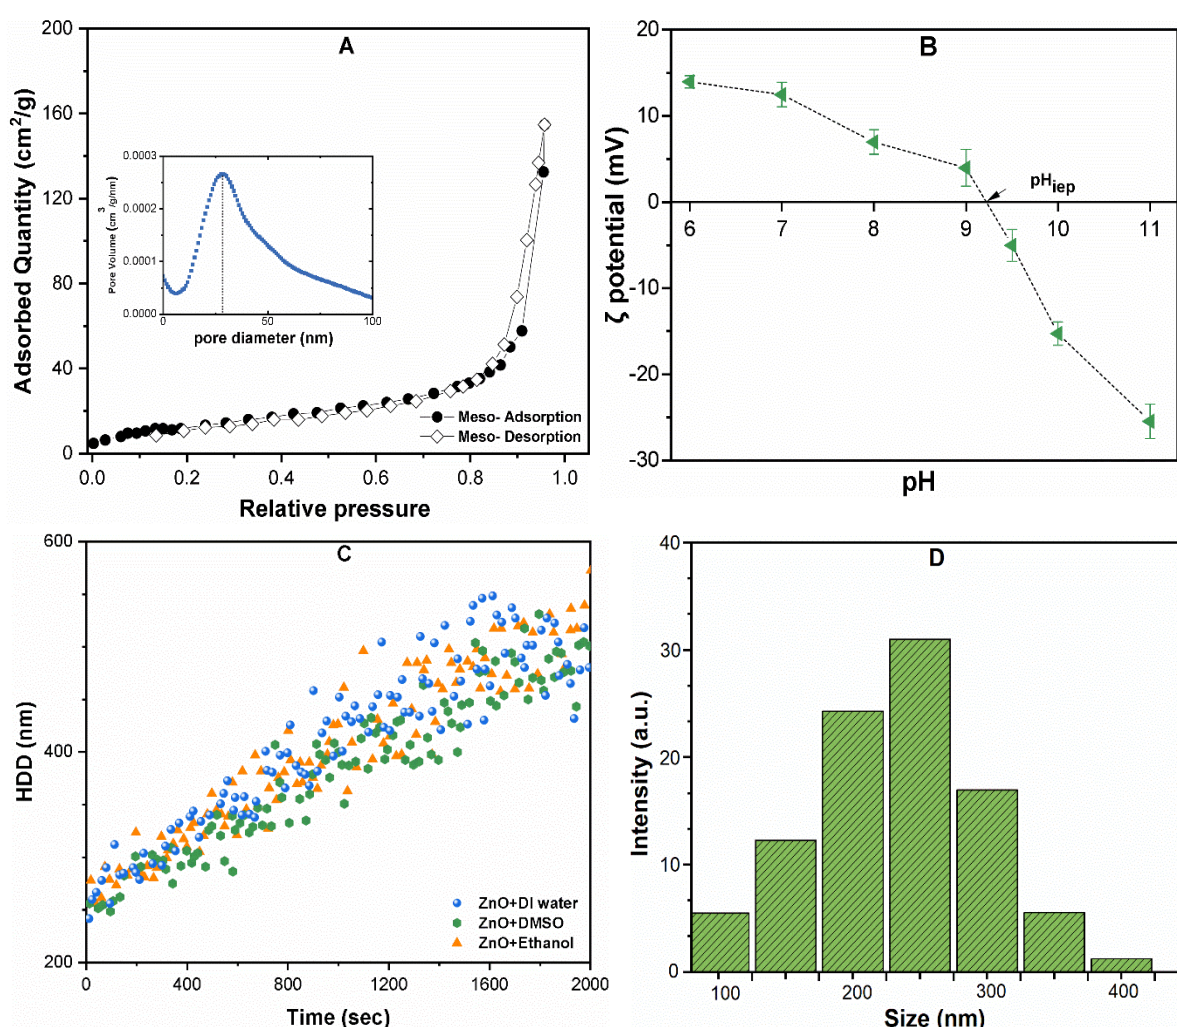

**Figure S1.** (A) Brunauer–Emmett–Teller (BET) analysis of zinc oxide nanoparticles (ZnO NPs) powder; (B) isoelectric point (IEP) of ZnO NPs in DI water; (C) aggregation kinetics of ZnO NPs in the absence and presence of the both solvents used for dissolving the polybrominated diphenyl ethers (PBDPEs); and (D) hydrodynamic size distribution of ZnO NPs in DI water after 30 min sonication

**Table S1.** Detailed properties of zinc oxide nanopatericles used in this study.

| Nanomaterials Parameter                                      | Unit                              | Technique         | Value                    |
|--------------------------------------------------------------|-----------------------------------|-------------------|--------------------------|
| Chemical formula                                             |                                   |                   | ZnO                      |
| Manufacturer-reported size <sup>a</sup>                      | nm                                | TEM               | <50                      |
| Bulk density <sup>a</sup>                                    | g(cm <sup>3</sup> ) <sup>-1</sup> | –                 | 5.60                     |
| Solubility                                                   |                                   |                   | High                     |
| Isoelectric point (pH <sub>iep</sub> , see Figure S1B)       | –                                 |                   | 9.2                      |
| Zeta potential in DI (pH=7)                                  | mV                                | Malvern Zetasizer | +12 ± 5.1                |
| HDD measured in DI (n=50)                                    | nm                                | DLS               | 280 ± 35                 |
| Purity / moisture content                                    | wt %                              | TGA/ICP-OES       | 96.52/1.85               |
| Crystalline structure                                        | –                                 | XRD               | Hexagonal                |
| Shape                                                        |                                   |                   | Polyhedral roughly round |
| Hamaker Constant                                             | J <sup>(b)</sup>                  | –                 | 1.9 × 10 <sup>-20</sup>  |
| Net energy barrier in pure water (IS 5 × 10 <sup>-6</sup> M) | kT <sup>(c)</sup>                 | -                 | 42.8                     |

<sup>a</sup> Vendor reported<sup>b</sup> [1]<sup>c</sup> 1 kT=4.1142x10<sup>-21</sup> J at 25 °C

ICP-OES: inductively coupled plasma optical emission spectroscopy

TGA: thermal gravimetric analysis

TEM: transmission electron microscopy

**Table S2.** Properties of the synthetic and natural waters used in the current study.

| Parameter                     | Unit                                 | Industrial Wastewater | Freshwater |
|-------------------------------|--------------------------------------|-----------------------|------------|
| pH *                          | –                                    | 7.54                  | 6.90       |
| IS                            | mML <sup>-1</sup>                    | 8.95                  | 0.79       |
| Conductivity*                 | µscm <sup>-1</sup>                   | 651                   | 119        |
| Na <sup>+</sup>               | mgL <sup>-1</sup>                    | 16.01                 | NM         |
| K <sup>+</sup>                | mgL <sup>-1</sup>                    | 8.53                  | 1.20       |
| Cu                            | mgL <sup>-1</sup>                    | 0.36                  | NM         |
| Fe                            | mgL <sup>-1</sup>                    | ND                    | NM         |
| Mg <sup>2+</sup>              | mgL <sup>-1</sup>                    | 28.15                 | 3.49       |
| As                            | mgL <sup>-1</sup>                    | 21.52                 | NM         |
| Ca <sup>2+</sup>              | mgL <sup>-1</sup>                    | 16.11                 | 1.50       |
| Sb                            | mgL <sup>-1</sup>                    | 27.77                 | NM         |
| Cl <sup>-</sup>               | mgL <sup>-1</sup>                    | 22.40                 | 6.61       |
| SO <sub>4</sub> <sup>2-</sup> | mgL <sup>-1</sup>                    | 10.52                 | NM         |
| TOC                           | mgL <sup>-1</sup>                    | 25                    | 10         |
| HCO <sub>3</sub>              | mg CaCO <sub>3</sub> L <sup>-1</sup> | –                     | 12         |
| PO <sub>4</sub>               | mgL <sup>-1</sup>                    | ND                    | 0.64       |

\*Measured in lab

ND = Not detected

NM = Not measured

## Results and Discussion

### 1.1. NPs Characterization

The Scherrer equation,  $D = (k\lambda/\beta hkl \cos\theta)$ , was used to determine the crystalline sizes of the ZnO NPs, where D is the crystalline size in nanometers (nm),  $\lambda$  is the wavelength of the radiation (1.54056 Å for CuK $\alpha$  radiation), k is a constant equal to 0.94,  $\beta hkl$  is the peak width at half-maximum intensity, and  $\theta$  is the peak position. In this study (102) plane was chosen to calculate the crystalline size. The crystalline sizes of the ZnO NPs were observed to be  $45 \pm 2$  nm, which is in accordance with the manufactured reported size (<50 nm).

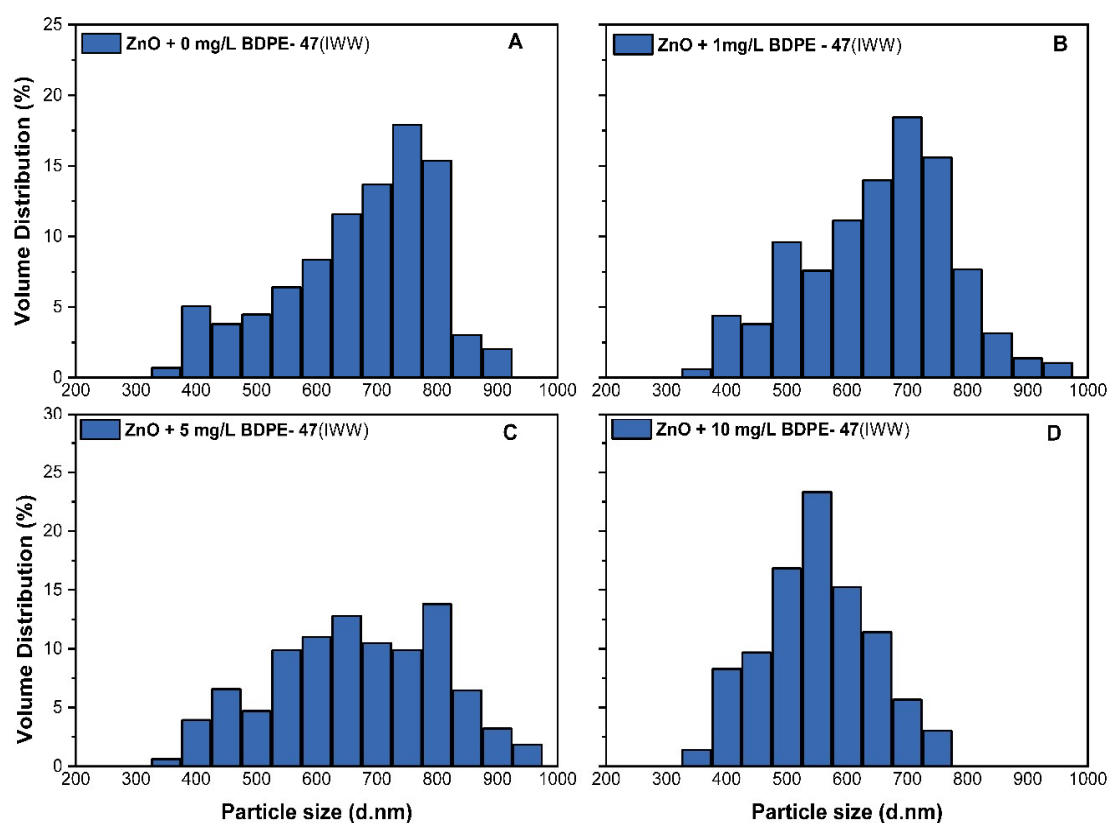

**Figure S2.** Volume distribution of ZnO NPs (10 mg/L) with different concentration of BDPE-47 showing (A) 0 mg/L; (B) 1 mg/L; (C) 5 mg/L; and (D) 10 mg/L in industrial wastewater (IWW).

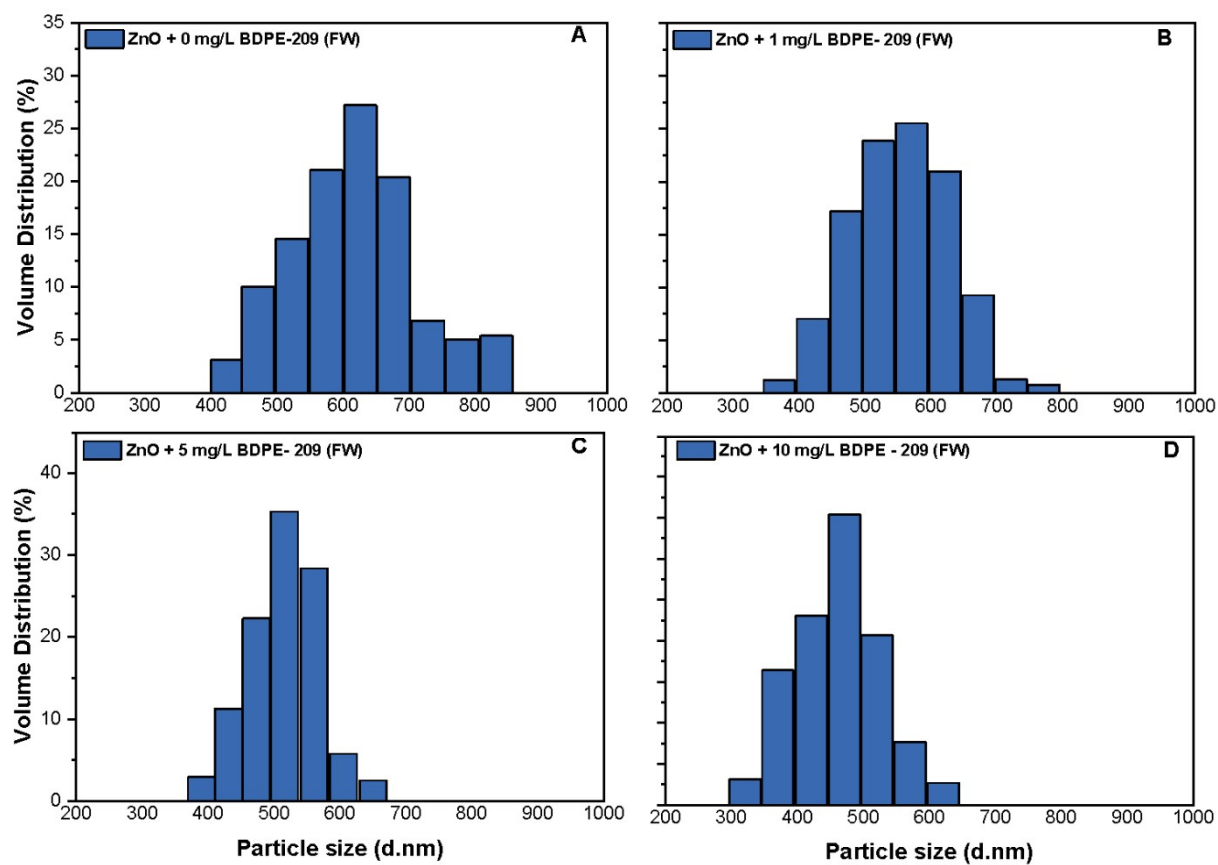

**Figure S3.** Volume distribution of ZnO NPs (10 mg/L) with different concentration of BDPE-209 showing (A) 0 mg/L ;(B) 1 mg/L; (C) 5 mg/L and; and (D) 10 mg/L in freshwater (FW).

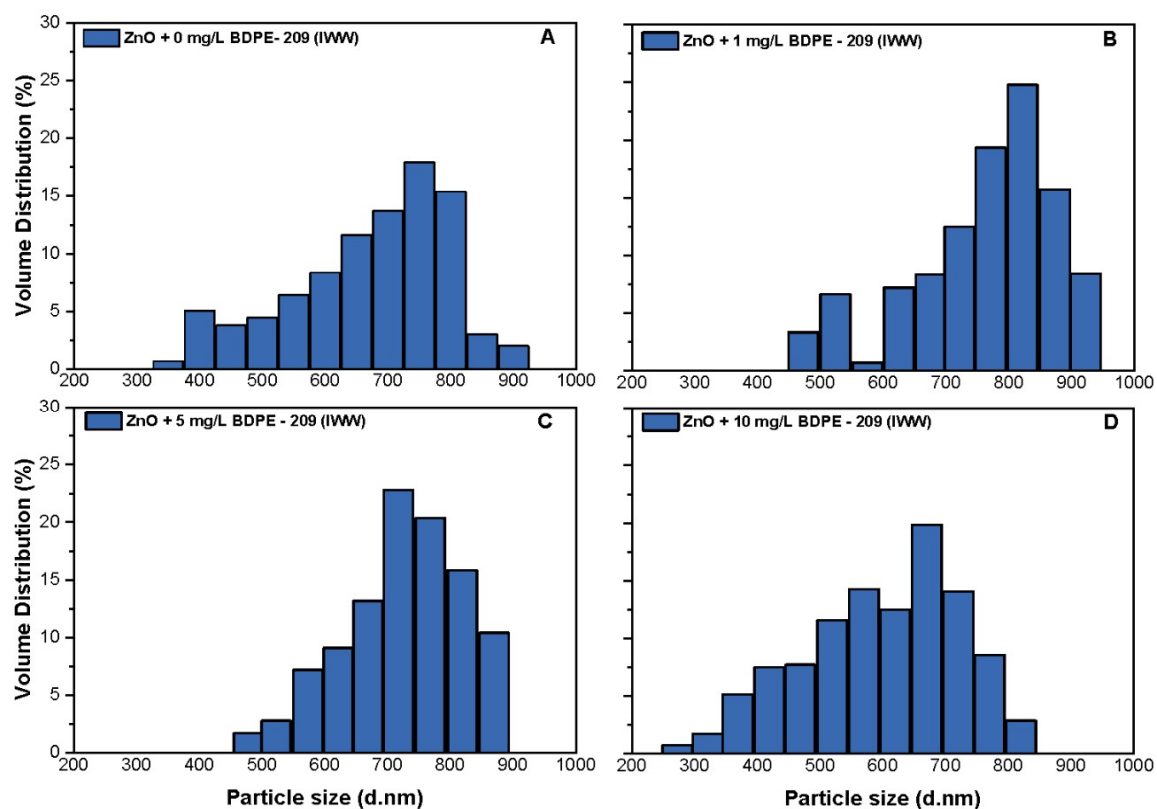

**Figure S4.** Volume distribution of ZnO NPs (10 mg/L) with different concentration of BDPE-209 showing (A) 0 mg/L ;(B) 1 mg/L; (C) 5 mg/L; and (D) 10 mg/L in IWW.

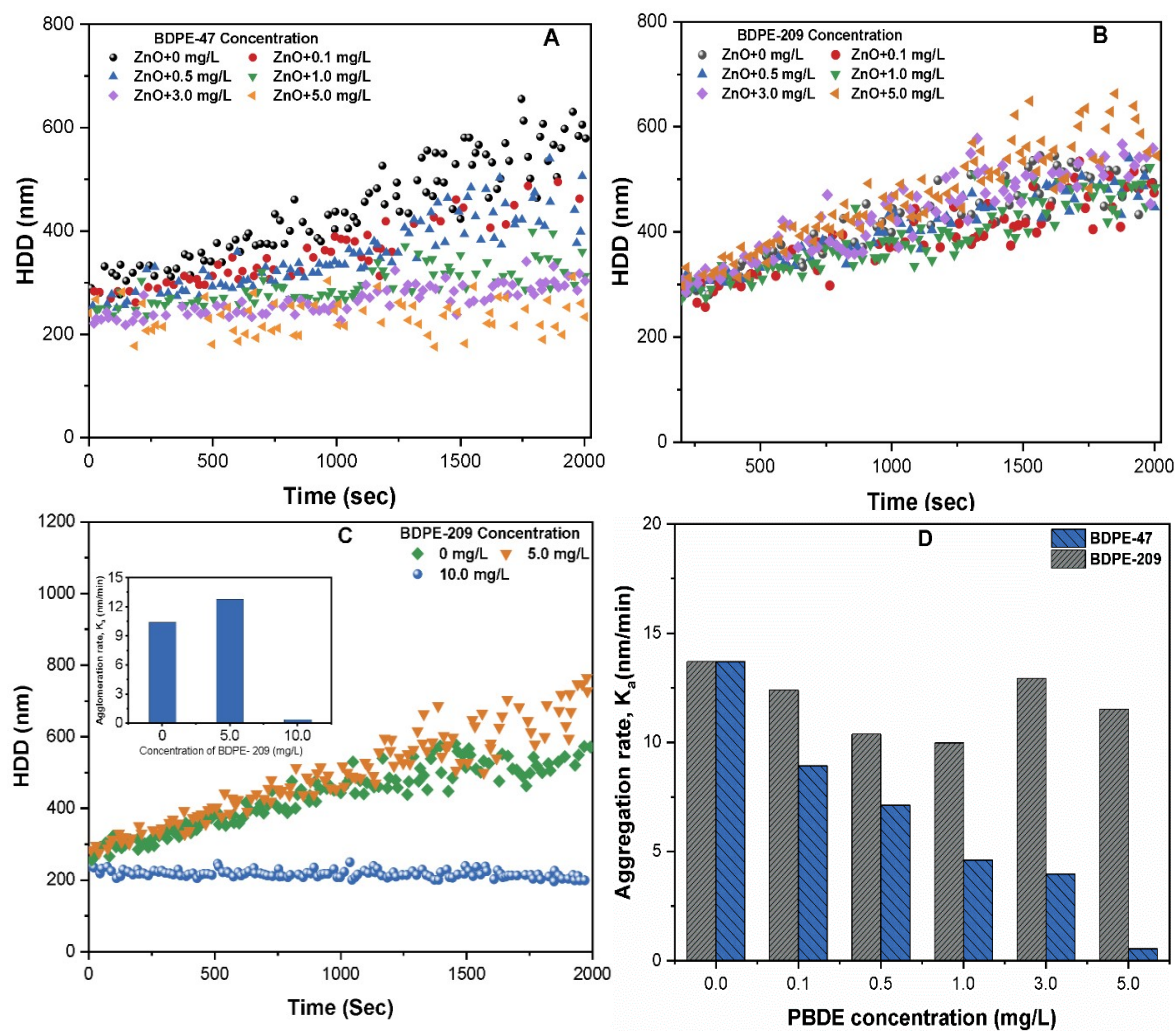

**Figure S5.** Effects of different concentration (0–5 mg/L) of (A) BDPE- 47 and (B) BDPE-209 on the aggregation kinetics of ZnO NPs (10 mg/L) in the presence of 20 mM KCl at pH 7; (C) aggregation kinetics of ZnO NPs in DI water containing 0, 5, and 10 mg/L BDPE-209, while inset showing aggregation rates at same concentrations; and (D) aggregation rates of ZnO NPs in at various concentration (0–5 mg/L) of BDPE- 47 and BDPE-209.



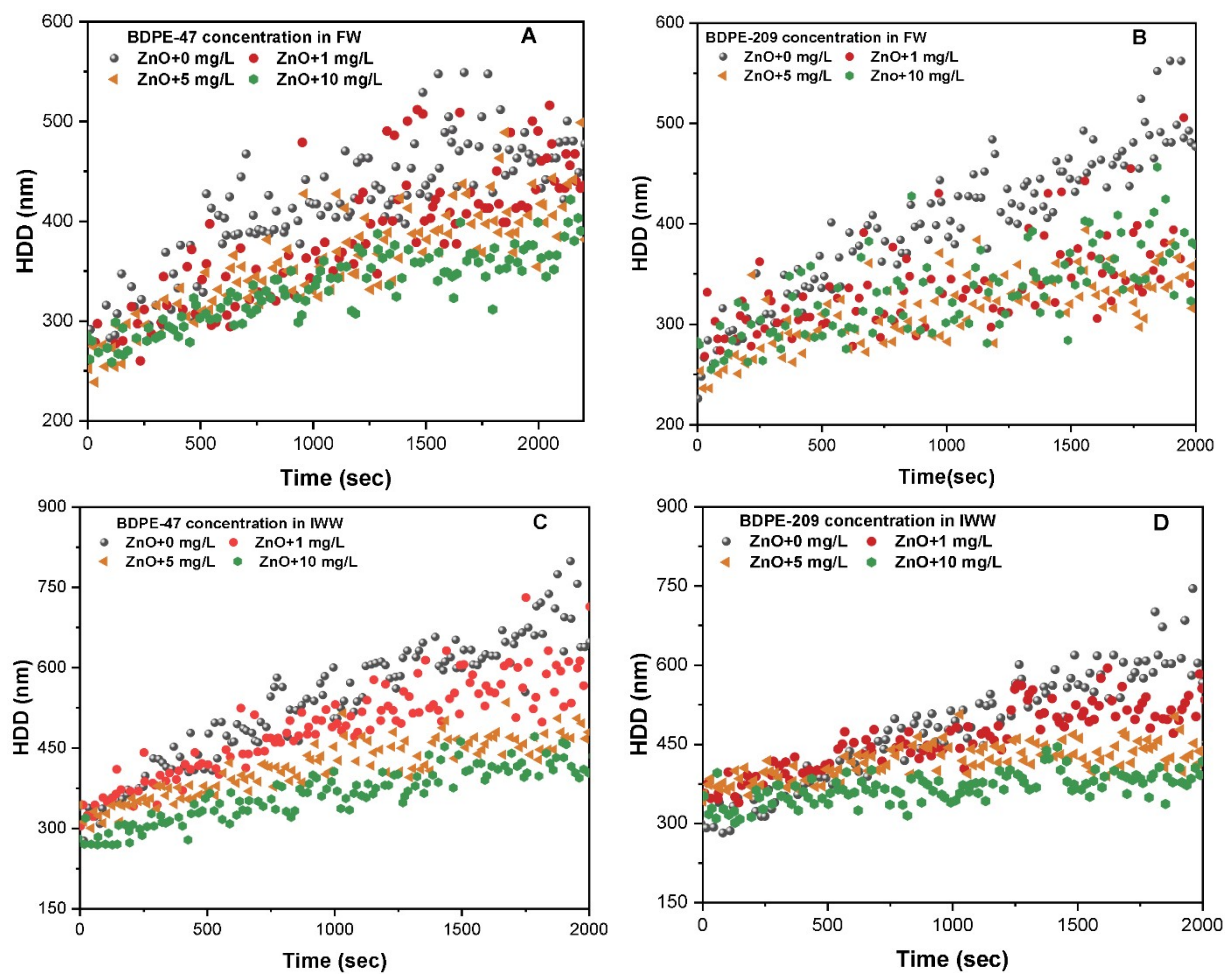

**Figure S6.** Effects of (A) BDPE- 47 and (B) BDPE-209 on the aggregation kinetics of ZnO NPs (10 mg/L) in FW, (C) BDPE -47, and (D) BDPE -209 on the aggregation kinetics of ZnO NPs in IWW.



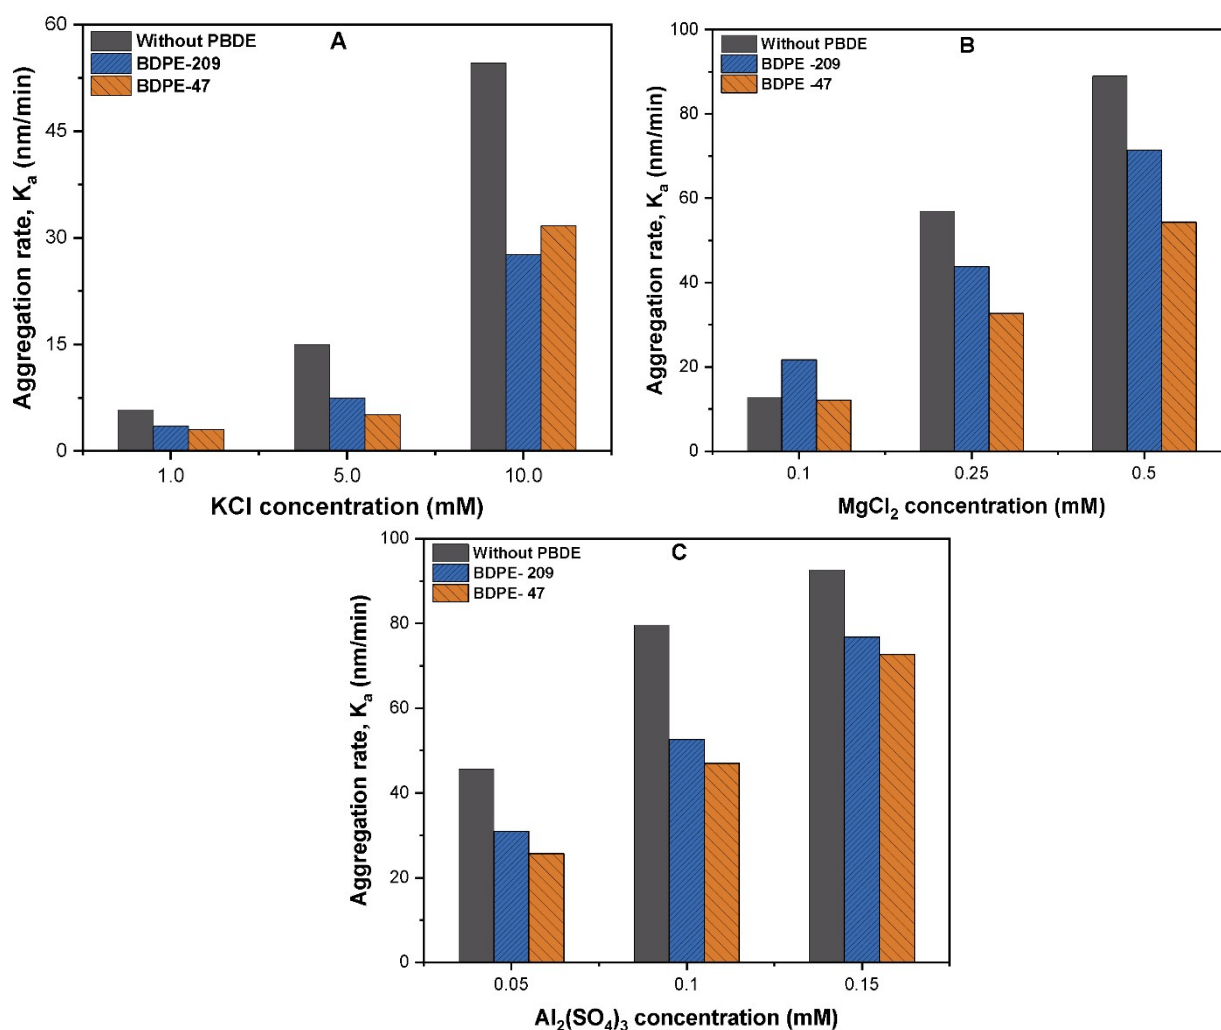

**Figure S7.** Aggregation rates of ZnO NPs (10 mg/L) in absence and presence (1 mg/L) of BDPE- 47 and BDPE -209 with (A) monovalent (KCl); (B) divalent ( $MgCl_2$ ); and (C) trivalent  $Al_2(SO_4)_3$  cations at pH 7.

#### References

1. Ackler, H. D.; French, R. H.; Chiang, Y. M. Comparisons of Hamaker constants for ceramic systems with intervening vacuum or water: From force laws and physical properties. *J. Colloid Interface Sci.* **1996**, 179, 460–469, doi:10.1006/jcis.1996.0238.

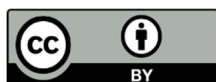

© 2019 by the authors. Submitted for possible open access publication under the terms and conditions of the Creative Commons Attribution (CC BY) license (<http://creativecommons.org/licenses/by/4.0/>).
